# Supplementary material
Source: HighWire-hosted journal article supplement (https://jitc.bmj.com/content/10/12/e005345)
Supplement: inline-supplementary-material-2 [file inline-supplementary-material-2.xlsx]

## Sheet: Sheet1
Supplementary Table 1 | Panel of organoids derived from MSI-H metastatic Colorectal cancer (MmC).
ID	stage at diagnosis	location primary	location metastasis	organoid derived from	MMR protein expression	therapy	result	status
MmC1$	p3TN1M0	Descending colon	2015: Liver	2015: Liver	MLH1/PMS2 loss	2010: Hemicolectomy CRC (pT3N1M0)	Radical resection	LTFUⱡ
						2010: Adjuvant chemotherapy 8x Capecitabine/Oxaliplatin	NA*
						2015: Laparoscopic liver segment S2/S3 resection	Radical resection
MmC2	p3TN0Mx	Ascending colon	Liver	2008: CRC	MLH1/PMS2 loss	2008: Hemicolectomy CRC (pT3N0Mx)	Radical resection	LTFUⱡ
MmC3	p3TN0M0	Sigmoid colon	2012: Lung	2017: Lymph-node	MLH1/PMS2 loss	2007: Hemicolectomy CRC (pT3N0M0)	Radical resection	LTFUⱡ
			2012: Lymph node			2012: Lung (metastases) segmentectomy	Radical resection
			2017: Lymph node			2012: Adjuvant chemotherapy 7x Capecitabine/Oxaliplatin	NA*
MmC4	pT4N0M1	Appendix	2019: Peritoneal	2019: Peritoneal	MSH2/MSH6 loss	2019: Extended hemicolectemy, cytoreductive surgery, and hyperthermic intraperitoneal chemotherapy (HIPEC)	radical resection, HIPEC NA*	Deceased
$MmC = MSI-H metastatic Colorectal Cancer
*NA = not appliccable
ⱡLTFU = lost to follow up
